# Supplementary material for: Decadal modulation of global surface temperature by internal climate variability
Source: Springer Nature journal article supplement (doi:10.1038/nclimate2605), 2015-04-07
Supplement: 41558_2015_BFnclimate2605_MOESM439_ESM.pdf [file 41558_2015_BFnclimate2605_MOESM439_ESM.pdf]

# Decadal modulation of global surface temperature by internal climate variability

4 Aiguo Dai, John C. Fyfe, Shang-Ping Xie, and Xingang Dai

## 5 **S1. Brief summary of the methodology**

6 We first estimated the response of global-mean surface temperature ( $T$ ) to historical forcings  
7 using the ensemble mean of the 66 all-forcing "historical" runs from 33 CMIP5 models<sup>1</sup>  
8 (<http://cmip-pcmdi.llnl.gov/cmip5/index.html>). Variations and changes associated with this  
9 estimate of the forced  $T$  time series were then removed from the observed  $T$  series at each grid  
10 point through linear regression (see Section S2). The residual  $T$  anomaly fields, referred to as  
11 detrended  $T$ , were then subjected to an Empirical Orthogonal Function (EOF) analysis (Section  
12 S5) in order to examine the contribution of the leading modes of the internal climate variability  
13 (ICV) to decadal global warming rates. Since the majority of the externally-forced signal was  
14 removed through the detrending, we consider the detrended  $T$  fields to consist of primarily  
15 unforced ICV. This detrending procedure (Section S3) using the CMIP5-simulated response is a  
16 key feature of our analysis. It reduces the chances for the externally-forced and unforced signals  
17 to mix up in the EOF expansion. An evaluation of this detrending method is presented in Section  
18 S3.

19 We emphasize that other detrending methods (e.g., linear detrending or using other time  
20 series<sup>2-3</sup>) are unlikely to remove most of the forced signal and produce a residual that can be  
21 considered as mostly ICV. Also, the spatial patterns of the leading EOFs may look similar with  
22 or without detrending (or using other detrending methods), but there are subtle differences in the  
23 EOF patterns and PC series that affect their contributions to the global-mean  $T$  series, as  
24 discussed below (Section S5).

25 Since our focus is on the decadal variations in global-mean  $T$ , not the overall warming rate  
26 over the entire analysis period from 1920 to 2013, we remove a warming bias in the average  
27 model-simulated global-mean  $T$  series through re-scaling. The impact of this removal on our  
28 results is examined in Section S4.

## 29 **S2. Linear regression analysis**

30 Let  $T(n, i)$  be the surface temperature annual anomaly ( $\Delta T$ ) at grid point  $i$  for year  $n$  from  
31 observations, where  $n=1, \dots, N=94$  for 1920-2013. Let an over bar denote the area-weighted  
32 average over the globe from 60°S-75°N, and  $\bar{T}(n)$  be the global-mean of  $T(n, i)$  from  
33 observations, and  $\bar{T}_m(n)$  be the global-mean surface air temperature annual anomaly for year  $n$   
34 from the CMIP5 multi-model ensemble mean of historical simulations (for 1919-2005) plus  
35 RCP4.5 simulations (for 2006-2013). For simplicity, we assume that the mean for the whole

36 analysis period (1920-2013) is removed in all the  $\Delta T$  series so that the intercept is zero and can  
 37 be ignored in all the linear regression equations listed below.

38 Generally, each  $\Delta T$  series may be considered as consisting of an externally-forced  
 39 component (denoted by subscript  $F$ , due to GHGs, aerosols, solar cycles and other external  
 40 forcing) and an unforced component (denoted by subscript  $I$ , due to internal climate variability).  
 41 For the global-mean  $\Delta T$  from observations, we have

$$42 \quad \overline{T}(n) = \overline{T}_F(n) + \overline{T}_I(n) . \quad (1)$$

43 Since the internal variations among individual realizations are usually uncorrelated and thus  
 44 are averaged out over a large number of ensemble members, the global mean  $\overline{T}_m(n)$  from the  
 45 large CMIP5 ensemble contains mostly the externally-forced response to the historical external  
 46 forcing changes with little internal variation. Despite various deficiencies in CMIP5 model  
 47 physics and external-forcings,  $\overline{T}_m(n)$  still provides a reasonable fit to the overall warming trend  
 48 during 1920-2013 [ $\overline{T}(n)$  from GISTEMP vs.  $\overline{T}_m(n)$ :  $r=0.96$ , slope  $\overline{b}_F=0.863$ ] and arguably  
 49 represents our best estimate of the temporal evolution of the response to historical external-  
 50 forcings. Thus, we estimate  $\overline{T}_F(n)$  using

$$51 \quad \overline{T}_F(n) = \overline{b}_F \overline{T}_m(n) , \quad (2)$$

52 where  $\overline{b}_F$  is the regression slope in  $\overline{T}(n) = \overline{b}_F \overline{T}_m(n) + \varepsilon$  (residual). The unforced component  
 53 can then be estimated as

$$54 \quad \overline{T}_I(n) = \overline{T}(n) - \overline{b}_F \overline{T}_m(n) . \quad (3)$$

55 This definition ensures that  $\overline{T}_F(n)$  and  $\overline{T}_I(n)$  are uncorrelated, as any part in  $\overline{T}(n)$  that is  
 56 correlated with  $\overline{T}_m(n)$  is removed through (3). We note that  $\overline{T}_I(n)$  may still contain some small  
 57 externally-forced changes that the CMIP5 ensemble mean may have missed and that are not  
 58 correlated with  $\overline{T}_m(n)$ , although  $\overline{b}_F \overline{T}_m(n)$  should account for the majority of the externally-  
 59 forced changes in the historical  $\Delta T$  record. Thus, we consider  $\overline{T}_I(n)$  as primarily consisting of  
 60 unforced, internally-generated variations.

61 *The focus of this study is to examine the temporal evolution of  $\overline{T}_I(n)$  and the spatial*  
 62 *patterns associated with  $\overline{T}_I(n)$ , and any physical or statistical modes of variability that may*  
 63 *contribute to this unforced component in the global-mean  $\Delta T$  series.* In particular, the role of  
 64 these leading modes in explaining decadal variations of the global warming rate, including the  
 65 warming hiatus during the most recent decade, is investigated.

66 Similar to  $\overline{T}(n)$ , the local  $\Delta T$  series  $T(n, i)$  may be considered as consisting of an  
 67 externally-forced [ $T_F(n, i)$ ] and an unforced internal [ $T_I(n, i)$ ] component, and each of these

68 components may be further separated into a part that is associated with their global counterpart  
69 and a local component, i.e.,

$$70 \quad T_F(n, i) = b'_F(i) [\overline{b}_F \overline{T_m}(n)] + \varepsilon_F(n, i) = b_F(i) \overline{T_m}(n) + \varepsilon_F(n, i), \quad (4)$$

$$71 \quad T_I(n, i) = b_I(i) \overline{T_I}(n) + \varepsilon_I(n, i), \quad (5)$$

$$72 \quad T(n, i) = b_F(i) \overline{T_m}(n) + b_I(i) \overline{T_I}(n) + \varepsilon_F(n, i) + \varepsilon_I(n, i), \quad (6)$$

73 where  $\varepsilon_I(n, i)$  and  $\varepsilon_F(n, i)$  contain, respectively, any local variability and local response to  
74 external forcing changes that are not accounted for by the global signals. The coefficients  
75  $b_F(i)$  and  $b_I(i)$  are estimated using following regressions:

$$76 \quad T(n, i) = b_F(i) \overline{T_m}(n) + \varepsilon \quad \text{and} \quad (7)$$

$$77 \quad T'(n, i) \equiv T(n, i) - b_F(i) \overline{T_m}(n) = b_I(i) \overline{T_I}(n) + \varepsilon. \quad (8)$$

78 We refer to  $T'(n, i)$  as the detrended  $\Delta T$  field, which may include some externally-forced local  
79 response ( $\varepsilon_F(n, i)$ ). However, by construction, the global means of the  $\varepsilon_F(n, i)$  and  $\varepsilon_I(n, i)$  are  
80 zero (i.e., they do not affect the global-mean  $\Delta T$ ), and the global mean of  $b_F(i)$  is  $\overline{b}_F$ , while the  
81 global mean of  $b_I(i)$  is one.

82 The spatial patterns of the regression coefficients  $b_F(i)$  (Fig. S9a) reveal how the externally-  
83 forced global warming signal [ $\overline{T_m}(n)$ ] projects onto the observed  $\Delta T$  fields. Similarly, the  
84 patterns of  $b_I(i)$  (Fig. S9d) depict how the unforced global internal variations [ $\overline{T_I}(n)$ ] project  
85 onto the observed  $\Delta T$  fields. Differences in these patterns provide insights into the different  
86 spatial structures associated with the externally forced and unforced components in the global-  
87 mean  $\Delta T$  series. Figure S9 shows that the regression patterns associated with the externally  
88 forced and unforced global components are different (pattern correlation coefficient  $r=0.11$ ),  
89 with the former resembling the pattern associated with the observed global-mean  $\Delta T$  (Fig. S9b)  
90 and the latter (Fig. S9d) resembling the pattern associated with the IPO (Fig. 2c). The warming  
91 trend pattern from observations (Fig. S9b) includes both externally forced changes and unforced  
92 natural variations.

### 93 **S3. Evaluation of the detrending procedure**

94 To evaluate how well our detrending method performs in removing the externally-forced  
95 changes in individual simulations, we analyzed 40 historical simulations from one coupled  
96 model [namely, the Community Climate System Model version 4 (CCSM4)] with identical GHG  
97 and other external forcing changes<sup>7</sup>. We estimated the externally-forced component at each grid  
98 point using Eq. (4) for each model simulation, averaged over these 40 estimates, and then  
99 compared this realization-mean pattern with that computed directly as an average over the  
100 anomaly patterns from each of the 40 simulations (Fig. S10). Our method captures well the

101 externally-forced signals (including volcanic) seen in the true ensemble mean. Similar results  
 102 were also found for individual runs, although some spread is seen at high latitudes where the  
 103 averaging area is small (Fig. S10c). Thus, our method of using CMIP5 ensemble mean and  
 104 global mean  $[\overline{T_m}(n)]$  and local regression to estimate and remove the externally-forced signal in  
 105 global  $\Delta T$  fields appears to work well.

106 Our analysis (Fig. 4 and Fig. S3) of the 30-member ensemble of all-forcing historical runs  
 107 by the CESM<sup>4</sup> (<http://www.cesm.ucar.edu/experiments/cesm1.1/LE/>) also suggests that our  
 108 method seems to work well, as the ensemble-mean based detrending removes the forced signal in  
 109 its run number 11, whose two leading EOFs account for the recent warming slowdown and other  
 110 decadal variations in global-mean T. These model results are consistent with our analysis of the  
 111 observed T, but in a cleaner setup with the forced response and unforced variations coming from  
 112 the same model.

#### 113 **S4. Model mean biases and their impacts**

114 We found that  $\overline{b_F} = 0.863$  (0.762) in Eq. (2) for using the GISTEMP (HadCRUT4) observational  
 115 data and the 66 simulations from 33 CMIP5 models. This suggests that this CMIP5 multi-model  
 116 ensemble overestimates the overall warming from 1920-2013 by about 14% (24%) compared  
 117 with that in the GISTEMP (HadCRUT4) dataset. This warming bias in the CMIP5 models has  
 118 been noticed previously<sup>8-9</sup>. However, there are substantial differences in the long-term trends in  
 119 the observational data sets, and  $\overline{T_m}(n)$  varies among models with different climate sensitivities.  
 120 These observational and model uncertainties make the assessment of the overall model warming  
 121 bias difficult. While this systematic bias is of concern and affects the recent decadal warming  
 122 rate in models, its impact on decadal T anomalies depend on the baseline period used to compute  
 123 the T anomalies for both the observations and the models. For example, if one chooses the recent  
 124 period from 2000 to 2013 as the baseline period, instead of the commonly used period from 1961  
 125 to 1990, then the disagreement between the observed and simulated T anomalies since 2000 is  
 126 much smaller than that shown in Fig. 1a. Since our focus is on decadal warming rates, we avoid  
 127 these issues by removing this warming bias in models by rescaling the global-mean T from  
 128 models using  $\overline{b_F}$  (=0.863 for GISTEMP).

129 Figure S2 shows that without this rescaling, the most recent decade still shows a warming  
 130 bias of about 0.1°C even after accounting for the impact of ICV. As mentioned above, the  
 131 magnitude of this bias in decadal T anomalies depends on the choice of the reference period and  
 132 thus can be misleading. The more robust signal is the change rate of the T anomalies, which  
 133 shows minimal warming since about 2000 for both observations and models with the two leading  
 134 EOFs taken into account (black and blue lines in Fig. S2a). Thus, while the overall warming bias  
 135 in the CMIP5 models induces a systematic difference between the observed and model-simulated  
 136 global-mean T since about 2000, the warming hiatus (i.e., the change rate) during this period is  
 137 largely accounted for by the two leading EOFs of ICV, with or without the rescaling.

138 We notice that the biases in model-simulated T response vary with individual forcings<sup>10</sup>.  
 139 Here we used a single scaling factor to remove the overall bias in model global-mean T. It is  
 140 straightforward to show that our scaling factor is a weighted average of the scaling factors for  
 141 individual forcings under the following assumptions commonly used in optimal fingerprinting<sup>11</sup>:  
 142 1) the models can simulate the response to individual forcings, and 2) the response to individual  
 143 forcings are additive. Let  $y_i(n)$  be the response of the global-mean T for year  $n$  to forcing  $i$  in  
 144 observations, and  $x_i(n)$  be the model-simulated response to forcing  $i$ , and  $f_i$  is the scaling factor  
 145 between the two so that  $y_i(n)=f_i x_i(n)$ . Since the responses are assumed to be additive, the total  
 146 response is

$$147 \quad y(n) = \sum_i y_i(n) = \sum_i f_i x_i(n) = f x(n) ,$$

148 where  $y(n)$  and  $x(n)$  are the total response to all forcing in observations and models, respectively,  
 149 and  $f$  is the overall scaling factor used in our analysis. It is clear that  $f = \sum_i f_i x_i(n)/x(n) =$   
 150  $\sum_i f_i x_i(n) / \sum_i x_i(n)$ . Thus, our rescaling method is equivalent to estimating the response to  
 151 individual forcings and then averaging them to derive the overall response to the total forcing.  
 152 Our method does not necessarily imply that the scaling factors are the same for the responses to  
 153 different forcings.

154 A similar argument applies to our detrending approach to remove the total response (i.e.,  $f x(n)$ )  
 155 from the observations, which is equivalent to estimating the response to each forcing (i.e.,  $f_i x_i(n)$ )  
 156 and then removing it from the observations. This is because the regressions employed here are  
 157 linear and hence the response is additive.  
 158

## 159 **S5. Empirical Orthogonal Function analysis**

160 To further investigate the leading modes underlying the externally-unforced patterns shown in  
 161 Fig. S9d and thus their impacts on the global-mean  $\Delta T$  series, we performed an Empirical  
 162 Orthogonal Function (EOF) analysis<sup>12</sup> of the detrended  $\Delta T$  field  $[T'(n, i)]$ . Since  $b_F(i) \overline{T_m}(n)$   
 163 accounts for the overwhelmingly large portion of the forced response at grid point  $i$ , removing  
 164 this externally-forced component reduces the chance of contamination between the externally  
 165 forced and unforced signals in the EOF decomposition. This is important given the relatively  
 166 short record length of 94 years in our analysis compared against the time scales of the decadal to  
 167 multi-decadal modes we are investigating.

168 As an alternative, we also performed an EOF analysis of the un-detrended  $\Delta T$  field (i.e.,  
 169  $T(n, i)$ ) from observations, and found that the first EOF represents the global warming mode that  
 170 essentially recovers the global-mean  $\Delta T$  series  $\overline{T}(n)$  (red line in Fig. S11a). As mentioned above,  
 171 the unforced component  $[\overline{T}_I(n)]$  in the global-mean  $\Delta T$  series is uncorrelated with the  
 172 externally-forced component  $[\overline{T}_F(n) = \overline{b_F} \overline{T_m}(n)]$ , thus the only possible reason for these two  
 173 components to be mixed into one EOF mode has to be due to the similarity in their associated  
 174 spatial patterns. To show this, we computed the following difference field:

$$\Delta T(n, i) = b(i) \bar{T}(n) - b_F(i) \bar{T}_m(n), \quad (9)$$

176 where  $b(i)$  is the slope in regression:  $T(n, i) = b(i) \bar{T}(n) + \varepsilon$ . Thus,  $\Delta T(n, i)$  represents the  
 177 difference between the  $\Delta T$  associated with both the global externally forced and unforced  
 178 components  $[\bar{T}_F(n) + \bar{T}_I(n)]$  and that associated with the externally-forced component  $[\bar{T}_F(n)]$   
 179 alone. In other words,  $\Delta T(n, i)$  may be considered as the  $\Delta T$  field associated with the internally-  
 180 generated component in the global-mean  $\Delta T$  series (but without local unforced variations, unlike  
 181  $T'(n, i)$ ). To reveal the spatial patterns of  $\Delta T(n, i)$ , we first computed the global-mean  $[\bar{\Delta T}(n)]$   
 182 of  $\Delta T(n, i)$  and then its regression slope with local  $\Delta T(n, i)$ , i.e.,

$$\Delta T(n, i) = b_D(i) \bar{\Delta T}(n) + \varepsilon. \quad (10)$$

184 The spatial patterns of  $b_D(i)$  (Fig. S9c) reveals that indeed they are similar to those associated  
 185 with the global forced change (Fig. S9a; pattern correlation coefficient  $r=0.99$ ). This leads to the  
 186 merger of  $\bar{T}_F(n) + \bar{T}_I(n)$  into the first principal component (PC1, Fig. S11a) whose spatial  
 187 pattern (Fig. S11b) resembles the pattern associated with the global-mean  $\Delta T$  (Fig. S9b), despite  
 188 the fact that  $\bar{T}_F(n)$  and  $\bar{T}_I(n)$  are uncorrelated.

189 One might argue that the whole global-mean  $\Delta T$  series (red line in Fig. S11a) should be  
 190 considered as the externally-forced response since its projected spatial pattern (Fig. S9b) is  
 191 similar to that associated with the externally-forced component (Fig. S9a). This would mean that  
 192 there are no internal, unforced variations in the observed global-mean  $\Delta T$  series. However, it is  
 193 well known that the global-mean  $\Delta T$  series from individual model runs contain unforced, random  
 194 variations that lead to considerable differences among individual runs, and the ensemble mean is  
 195 often the best estimate of the forced response<sup>4,13</sup>. Thus, the observed global-mean  $\Delta T$  series is  
 196 expected to contain some unforced variations, since the observations are sampled from one  
 197 realization.

198 To show the differences in the EOFs for the undretrended and detrended  $\Delta T$  fields, we write  
 199 down the EOF expansions for both  $T(n, i)$  and  $T'(n, i)$ , and denote the global warming or trend  
 200 mode (Fig. S11a-b) as  $eof_o$  for the  $T(n, i)$  case:

$$T(n, i) = pc_o(n) eof_o(i) + pc_1(n) eof_1(i) + pc_2(n) eof_2(i) + \dots \quad (11)$$

$$T'(n, i) = PC_1(n) EOF_1(i) + PC_2(n) EOF_2(i) + \dots \quad (12)$$

203 Since  $T'(n, i) = T(n, i) - b_F(i) \bar{T}_m(n)$ , we have

$$\begin{aligned} 204 \quad PC_1(n) EOF_1(i) + PC_2(n) EOF_2(i) + \dots &= [pc_o(n) eof_o(i) - b_F(i) \bar{T}_m(n)] + \\ 205 \quad pc_1(n) eof_1(i) + pc_2(n) eof_2(i) + \dots & \end{aligned} \quad (13)$$

206

207 We found that the  $PC_k$  and  $EOF_k$  (Fig. 2) of  $T'(n, i)$  are similar to the  $pc_k$  and  $eof_k$  (Fig. S11) of  
 208  $T(n, i)$ , respectively, for the leading modes. However, there are some subtle differences between  
 209 them that lead to non-zero global-mean values of the  $EOF_k$  coefficients, while the global-mean  
 210 of the  $eof_k$  coefficients are close to zero. These differences result from the projection of the term  
 211  $[\Delta T_{om}(n, i) \equiv pc_o(n) eof_o(i) - b_F(i) \overline{T_m}(n)]$  onto the spatial patterns of the leading modes  
 212 (especially  $eof_1$  and  $eof_4$ ). When averaged globally, this term represents the observation-minus-  
 213 model difference in their global-mean  $\Delta T$  (black line in Fig. 1b), i.e.,

$$214 \quad \overline{\Delta T_{om}}(n) = pc_o(n) \overline{eof_o(i)} - \overline{b_F} \overline{T_m}(n) \approx PC_1(n) \overline{EOF_1(i)} + PC_2(n) \overline{EOF_2(i)} + \dots \quad (14)$$

215 Thus, the impact of all internally-generated climate variations ( $\overline{\Delta T_{om}}(n)$ ) project onto the  
 216 leading EOF<sub>k</sub> of the detrended  $\Delta T$  fields. This alters the original  $eof_k$  modes slightly such that  
 217 they have non-zero global means. The higher-order EOFs from the detrended data show very  
 218 small global means for their EOF coefficients (like in the un-detrended case), leading to small  
 219 contributions to  $\overline{\Delta T_{om}}(n)$ .

220 In summary, we found that without the detrending of Eq. (8) (or detrending with the global-  
 221 mean  $\Delta T$  from observations), the leading EOF modes (besides the trend mode, Fig. S11) will not  
 222 include the impacts of these modes on the global-mean  $\Delta T$ , as their influences are either mixed  
 223 up with the trend mode (due to the similarity of their spatial patterns), or contained in the global-  
 224 mean  $\Delta T$  series that is removed from the data. The detrending using Eq. (8) removes most of the  
 225 externally forced changes in the observed  $\Delta T$  fields, thus reducing the chance of mixing the  
 226 externally forced changes and unforced variations in the EOF expansion. The impact of the  
 227 internal variations on the global-mean  $\Delta T$  should come primarily from the leading modes of  
 228 variability and thus it is projected mainly onto the leading EOF modes.

229

## 230 **References:**

- 231 1. Taylor, K. E., R. J. Stouffer, and G. A. Meehl, 2012: An overview of CMIP5 and the  
 232 experiment design. *Bull. Amer. Meteorol. Soc.*, **93**, 485-498.  
 233 2. DelSole, T., M.K. Tippett, J. Shukla 2011: A significant component of unforced multidecadal  
 234 variability in twentieth century global warming. *J. Clim.*, **24**, 909-926.  
 235 3. Wu, Z., N.E. Huang, J.M. Wallace, B.V. Smoliak, X. Chen, 2011: On the time-varying  
 236 trend in global-mean surface temperature. *Clim. Dyn.* **37**, 759-773.  
 237 4. Kay, J. E., C. Deser, A. Phillips, A. Mai, C. Hannay, G. Strand, J. Arblaster, S. Bates, G.  
 238 Danabasoglu, J. Edwards, M. Holland, P. Kushner, J. -F. Lamarque, D. Lawrence, K.  
 239 Lindsay, A. Middleton, E. Munoz, R. Neale, K. Oleson, L. Polvani, and M. Vertenstein,  
 240 2015: The Community Earth System Model (CESM) Large Ensemble Project: A  
 241 Community Resource for Studying Climate Change in the Presence of Internal Climate

- 242 Variability. *Bull. Amer. Met. Soc.*, doi: <http://dx.doi.org/10.1175/BAMS-D-13-00255.1>, in  
243 press. [[Article Download](#)]
- 244 5. Hansen, J., R. Ruedy, M. Sato, and K. Lo, 2010: Global surface temperature change. *Rev.*  
245 *Geophys.* **48**, RG4004, doi:10.1029/2010RG000345.
- 246 6. Morice, C. P., J. J. Kennedy, N. A. Rayner, and P. D. Jones, 2012: Quantifying uncertainties  
247 in global and regional temperature change using an ensemble of observational estimates:  
248 The HadCRUT4 dataset, *J. Geophys. Res.*, doi:10.1029/2011JD017187.
- 249 7. Mudryk, L.R., P.J. Kushner, and C. Derksen, 2013: Interpreting observed northern hemisphere  
250 snow trends with large ensembles of climate simulations. *Clim. Dyn.*, DOI 10.1007/s00382-  
251 013-1954-y.
- 252 8. Gillett, N. P., V. K. Arora, G. M. Flato, J. F. Scinocca, and K. von Salzen, 2012: Improved  
253 constraints on 21st-century warming derived using 160 years of temperature observations,  
254 *Geophys. Res. Lett.*, **39**, L01704, doi:10.1029/2011GL050226.
- 255 9. Fyfe, J. C., N. P. Gillett and F.W. Zwiers, 2013: Overestimated global warming over the past  
256 20 years. *Nat. Clim. Change*, **3**, 767-769.
- 257 10. IPCC, 2013: Climate Change 2013: The Physical Science Basis. Contribution of Working  
258 Group I to the Fifth Assessment Report of the Intergovernmental Panel on Climate Change,  
259 edited by T. E. Stocker et al., Cambridge University Press, Cambridge, United Kingdom  
260 and New York, NY, USA.
- 261 11. Ribes, A., S. Planton and L. Terray: 2013: Application of regularized optimal fingerprinting  
262 to attribution. Part I: method, properties and idealized analysis. *Clim Dyn.* **41**: 2817–2836.
- 263 12. Monahan, A.H., J.C. Fyfe, M.H.P. Ambaum, D. Stephenson, and G.R. North, 2009:  
264 Empirical orthogonal functions: The medium is the message. *J. Climate*, **22**, 6501-6514.
- 265 13. Knutti, R., R. Furrer, C. Tebaldi, J. Cermak, and G. A. Meehl, 2010: Challenges in  
266 combining projections from multiple climate models. *J. Climate*, **23**, 2739-2758.

267  
268  
269  
270  
271  
272



273

274

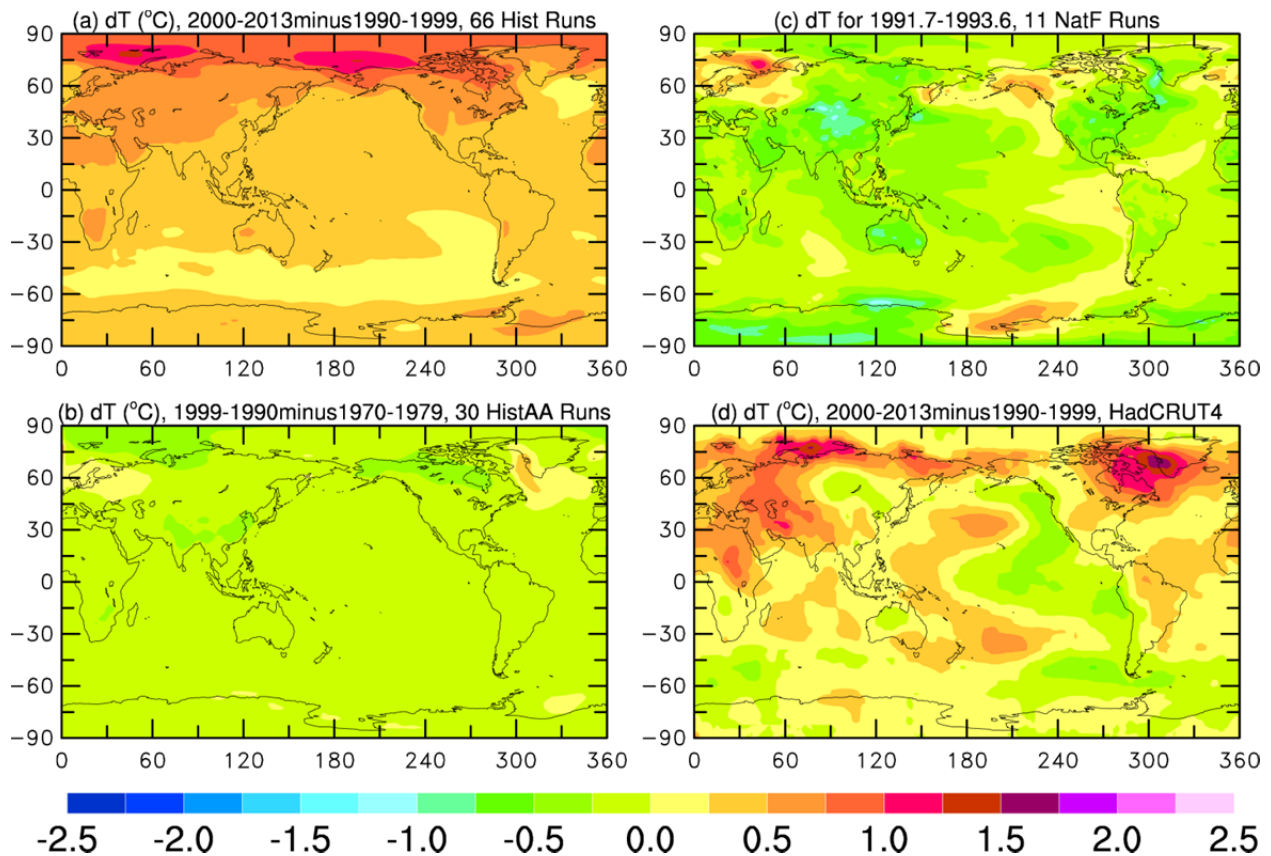

275

276 **FIG. S1. Comparisons of the spatial patterns of the recent surface temperature changes.** (a)  
 277 2000-2013 minus 1990-1999 difference of surface air temperature ( $T_{as}$ , in °C) from the  
 278 ensemble mean of the 66 historical all forcing simulations by 33 CMIP5 models; (b) 1999-1990  
 279 minus 1970-1979  $T_{as}$  difference from the ensemble mean of 30 historical anthropogenic aerosol  
 280 forcing only simulations by 8 CMIP5 models; (c)  $T_{as}$  anomalies during July 1991-June 1993  
 281 (relative to the mean averaged over June 1988 - May 1991 and January 1994 - December 1996)  
 282 after the Pinatubo volcanic eruption in June 1991 in the ensemble mean of 11 natural forcing  
 283 only runs by 3 CMIP5 models (CCSM4, GFDL-CM3 and HaGEM2); and (d) the observed  
 284 surface temperature difference between 2000-2013 and 1990-1999 based on the HadCRUT4  
 285 dataset<sup>6</sup>. This figure shows that the recent warming hiatus resulted from a cancellation of  
 286 warming over most land areas and the Atlantic and Indian Oceans by cooling concentrated in the  
 287 eastern Pacific Ocean, and that the temperature change patterns induced by recent volcanic or  
 288 anthropogenic aerosol forcing or GHG increases are inconsistent with and thus cannot explain  
 289 the observed temperature change patterns since the 1990s.

290

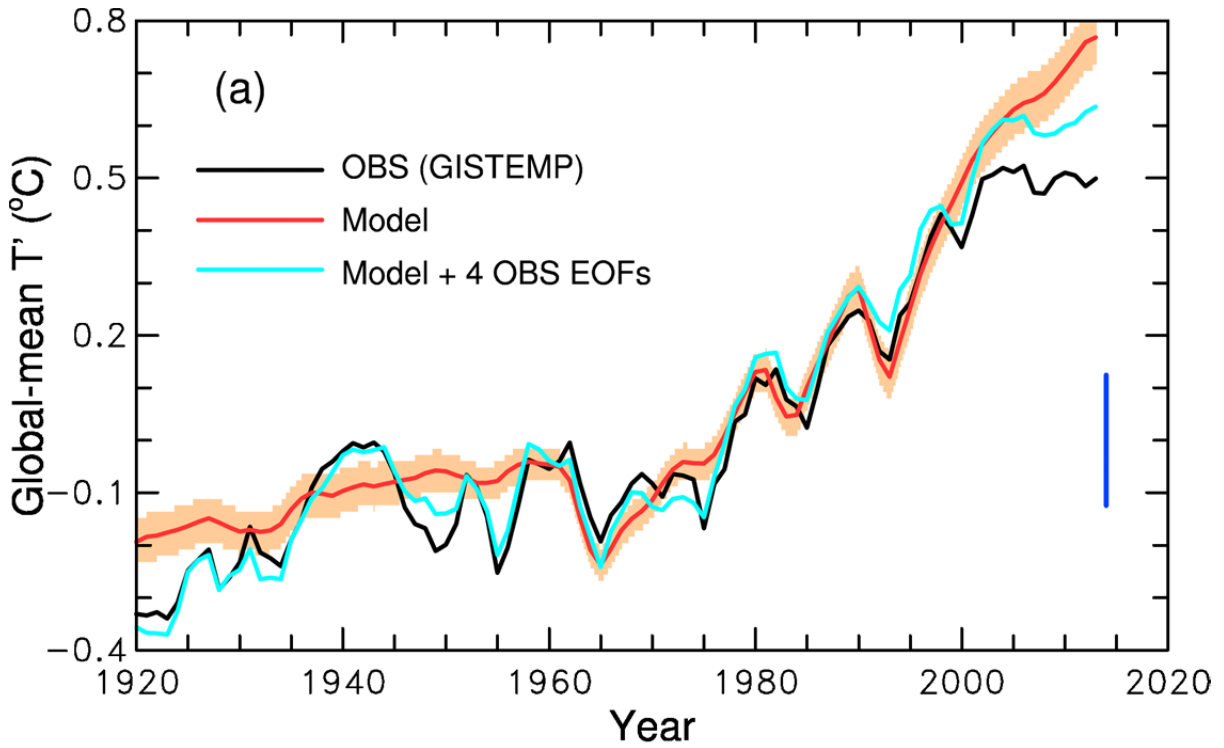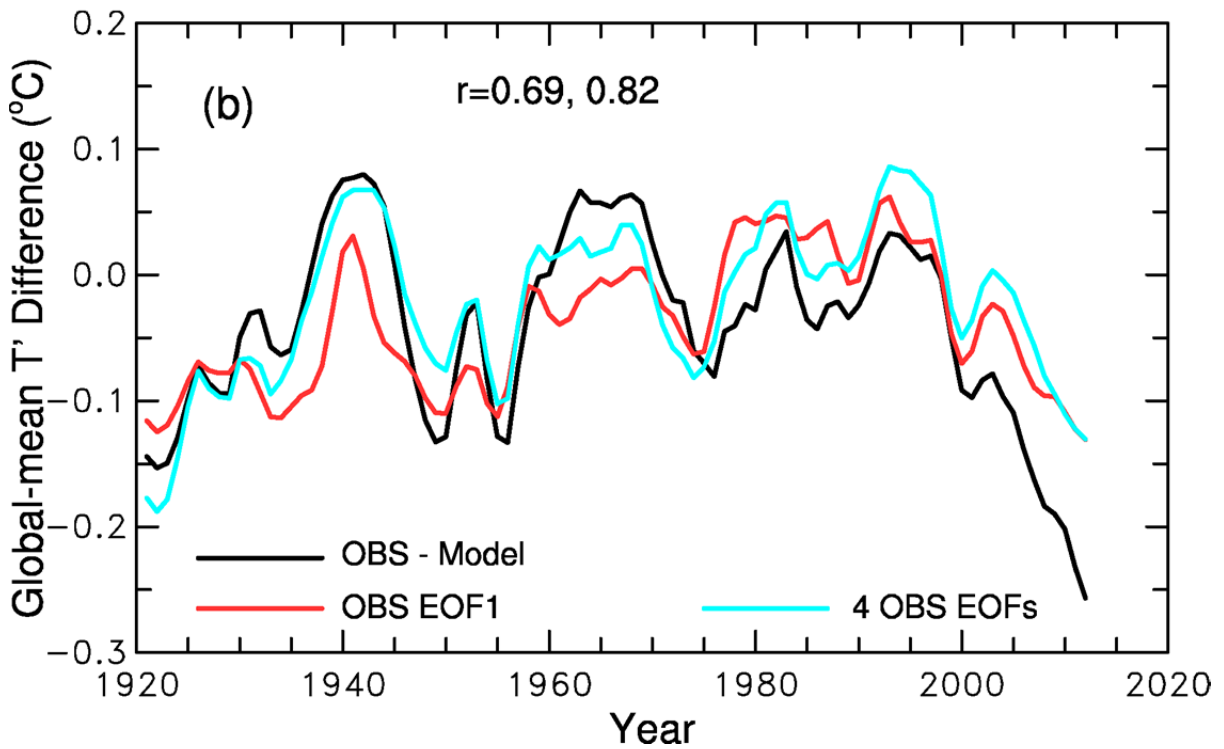

291

292 **FIG. S2.** Same as Fig.1 but without scaling the model-mean  $T$  (red line in a) by a factor of 0.863.

293

294

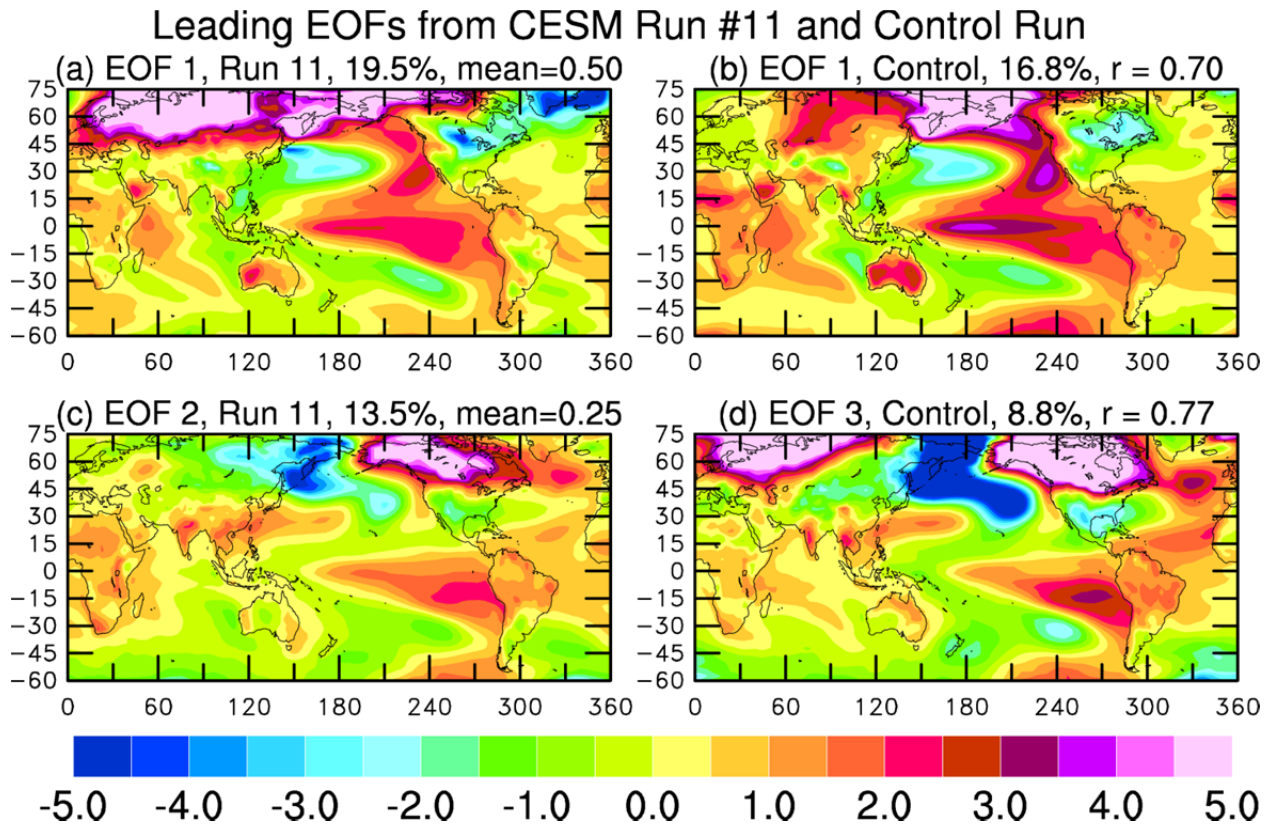

295

296

297

298

299

300

301

**FIG. S3. Comparison of the two leading EOFs of the detrended T from CESM1 historical run number 11 (left column) and the similar EOFs of the T from a 550-year period of a control run (right column) by the same model<sup>4</sup>. The pattern correlation between the left and right panels of the same row is shown as  $r$  on top of panel (b) and (d). The % numbers are the % variance explained by the EOFs.**

301

302

303

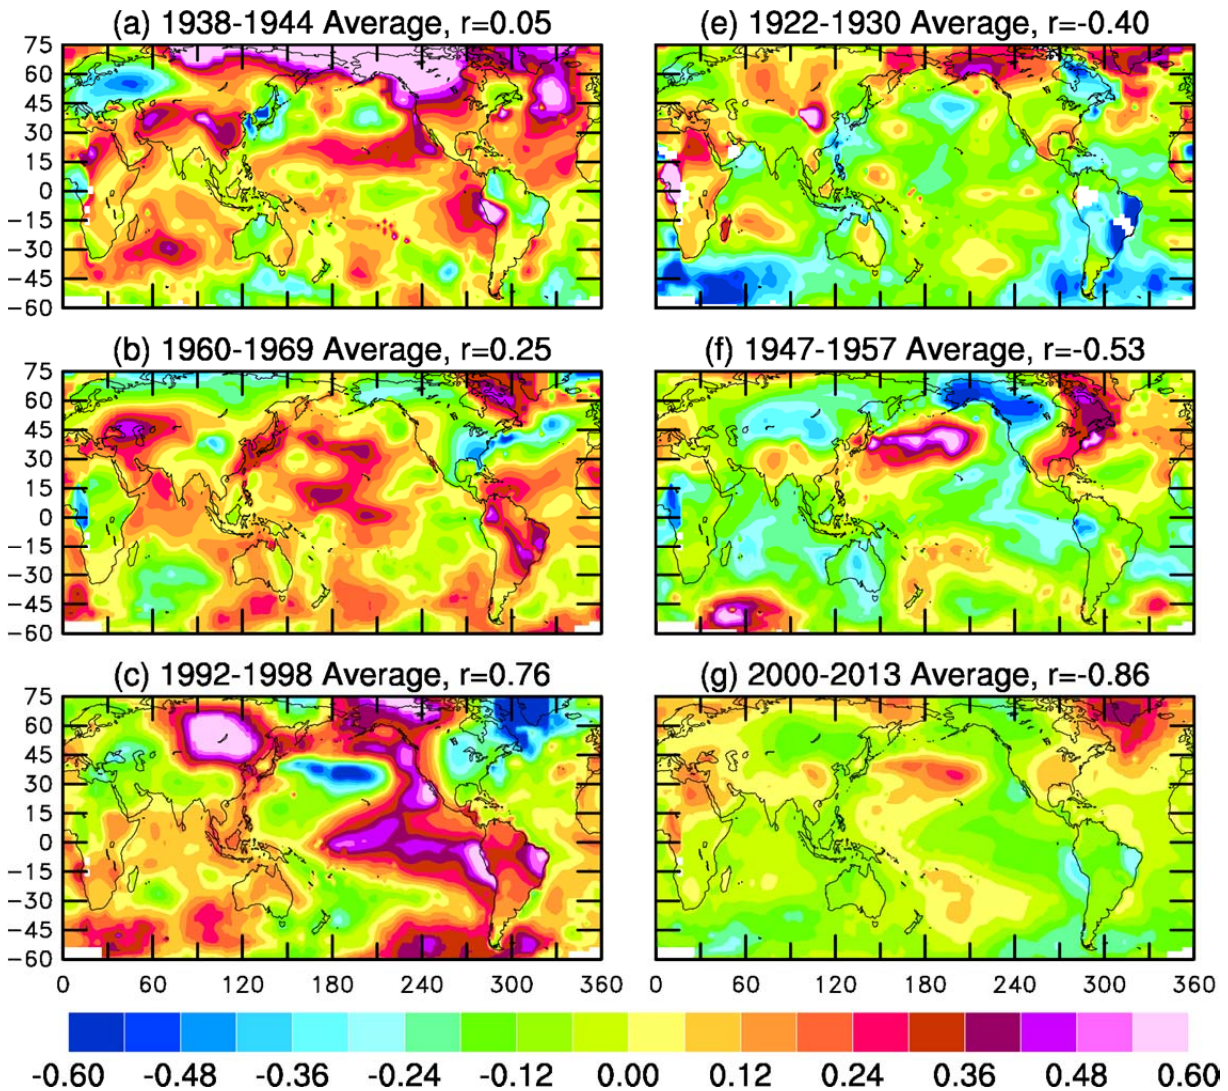

304

305 **FIG. S4. Spatial patterns of the warm (left) and cold (right) periods in the detrended**  
 306 **GISTEMP data set<sup>5</sup>.** The CMIP5 multi-model ensemble global-mean surface air temperature  
 307 anomalies were used to detrend the GISTEMP temperature anomalies at each box during 1920-  
 308 2013 through linear regression (see SI). The anomalies ( $^{\circ}\text{C}$ ) are relative to the 1961-1990 mean.  
 309 The pattern correlation coefficient ( $r$ ) with the IPO EOF (Fig. 2b) is shown on top of the panel.

310

311

312

313

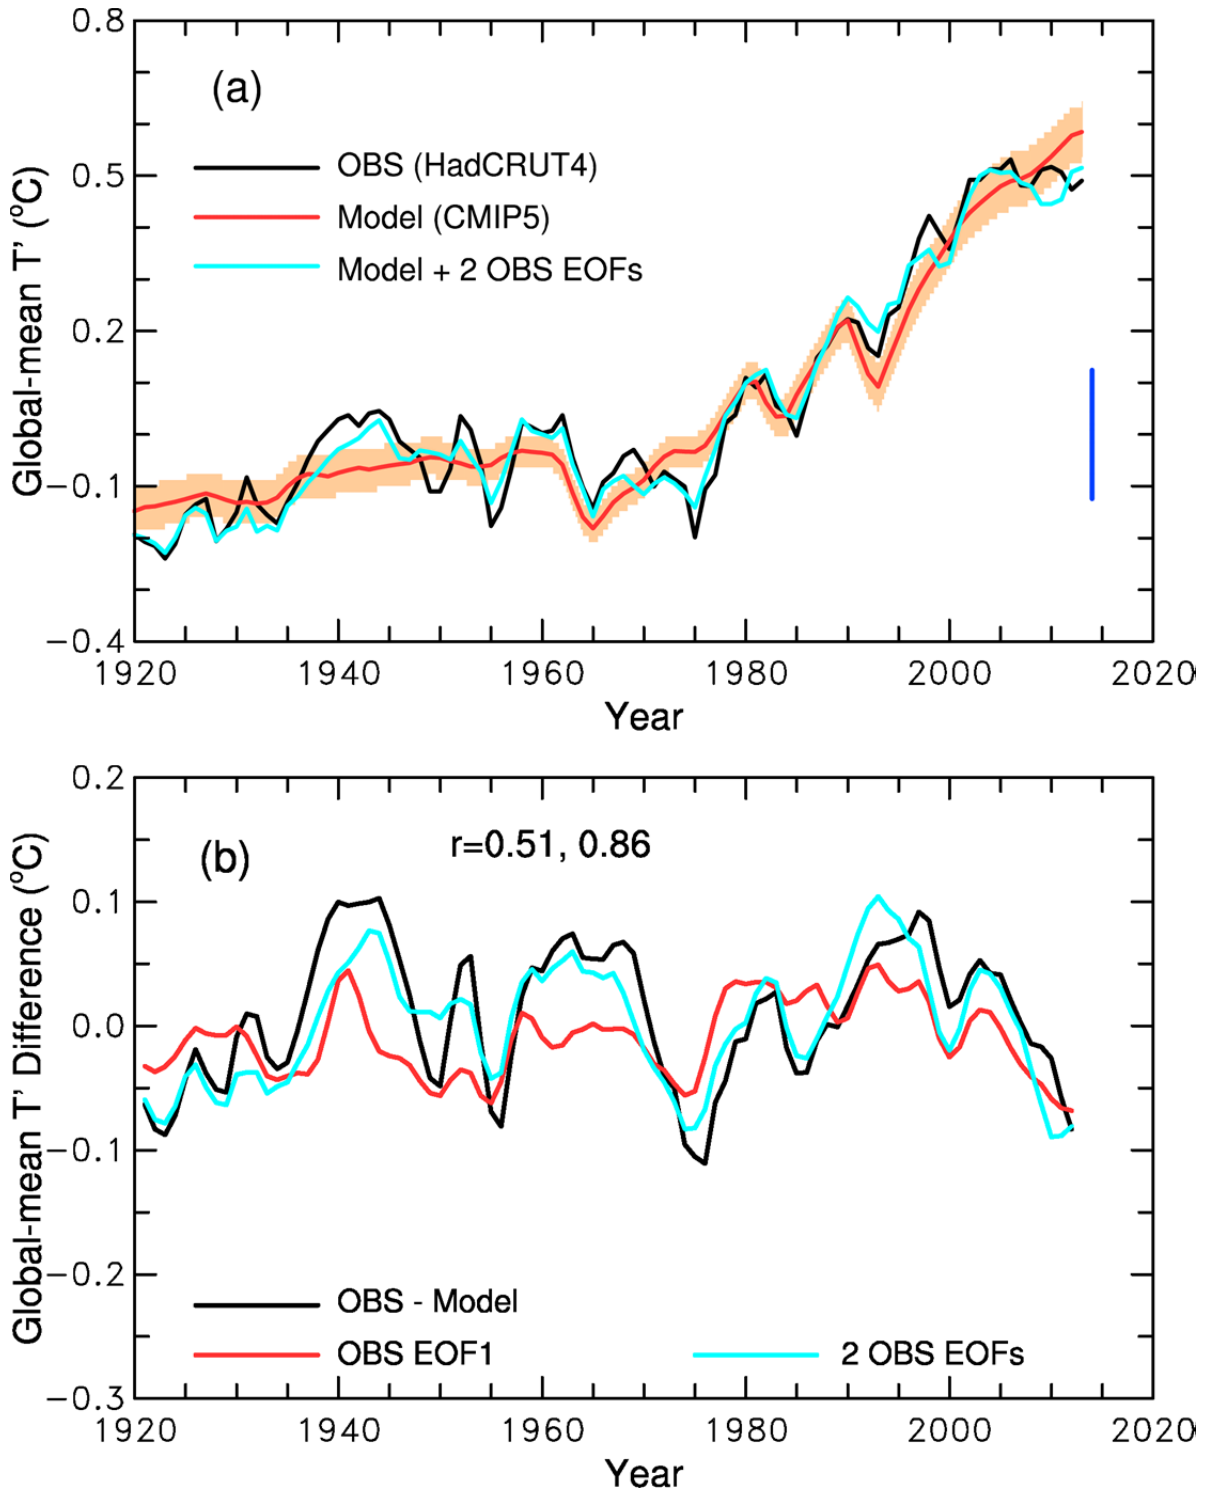

314

315 **FIG. S5.** Same as Fig. 1 but for using the HadCRUT4 data set<sup>6</sup> as the observations. The  
 316 regression-derived scaling factor is 0.762, which is used to multiply the model-simulated  
 317 anomaly series (red line).

318

319

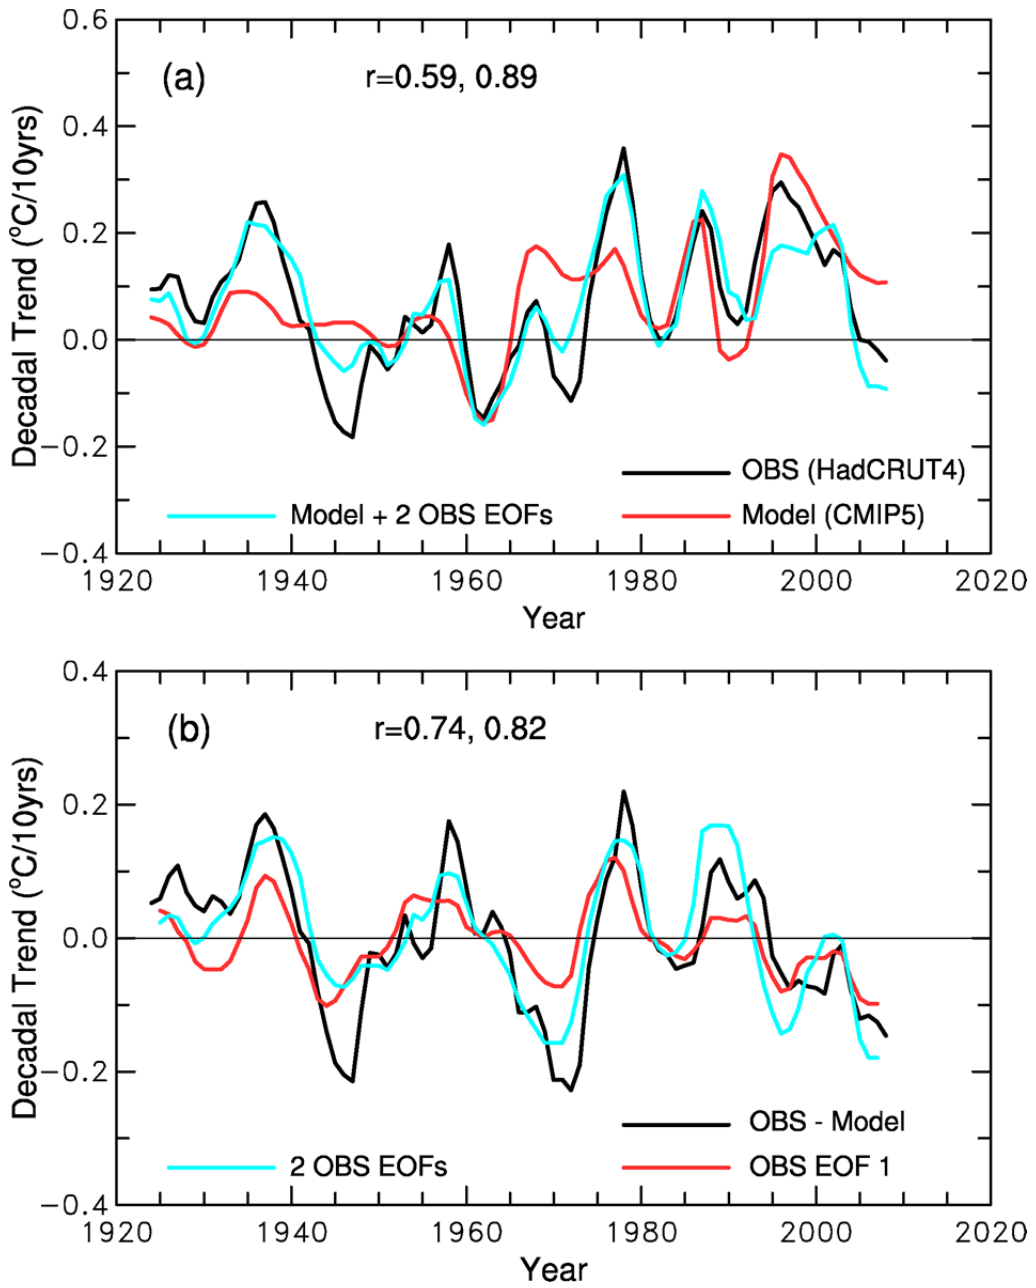

320

321 **Fig. S6.** Same as Fig. 3 but for using the HadCRUT4 as the observational data set.

322

323

324

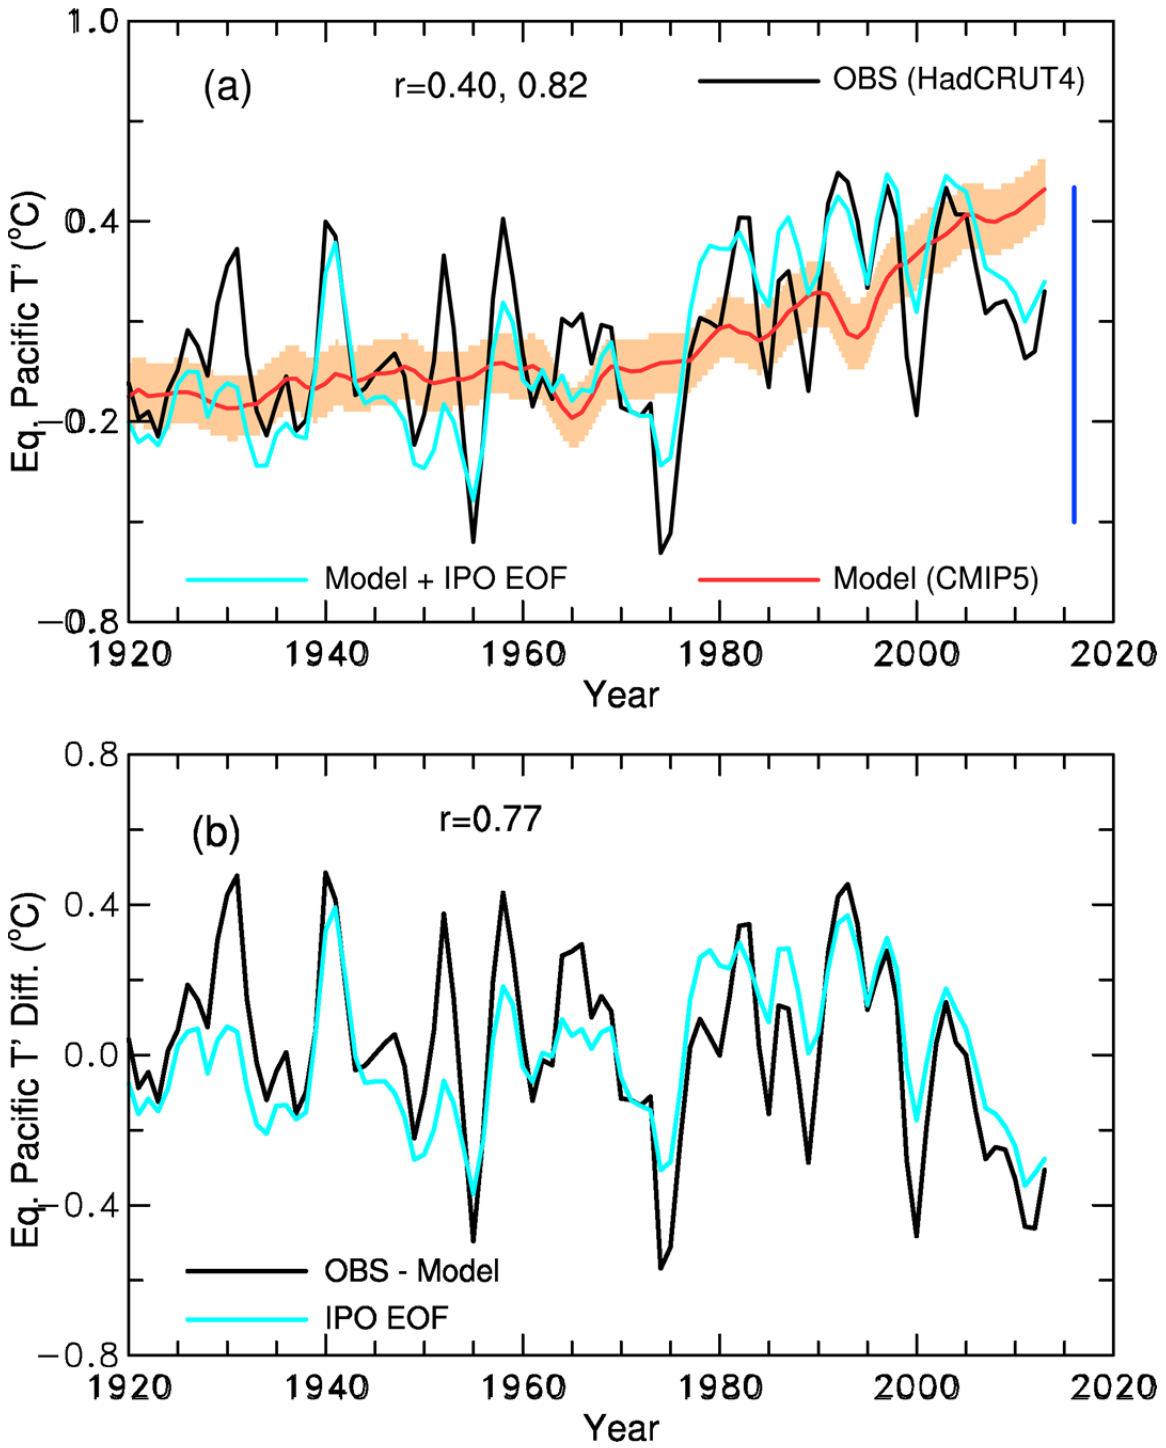

325

326 **FIG. S7.** Same as Fig. 5 but for using HadCRUT4 as the observational data set.

327

328

329

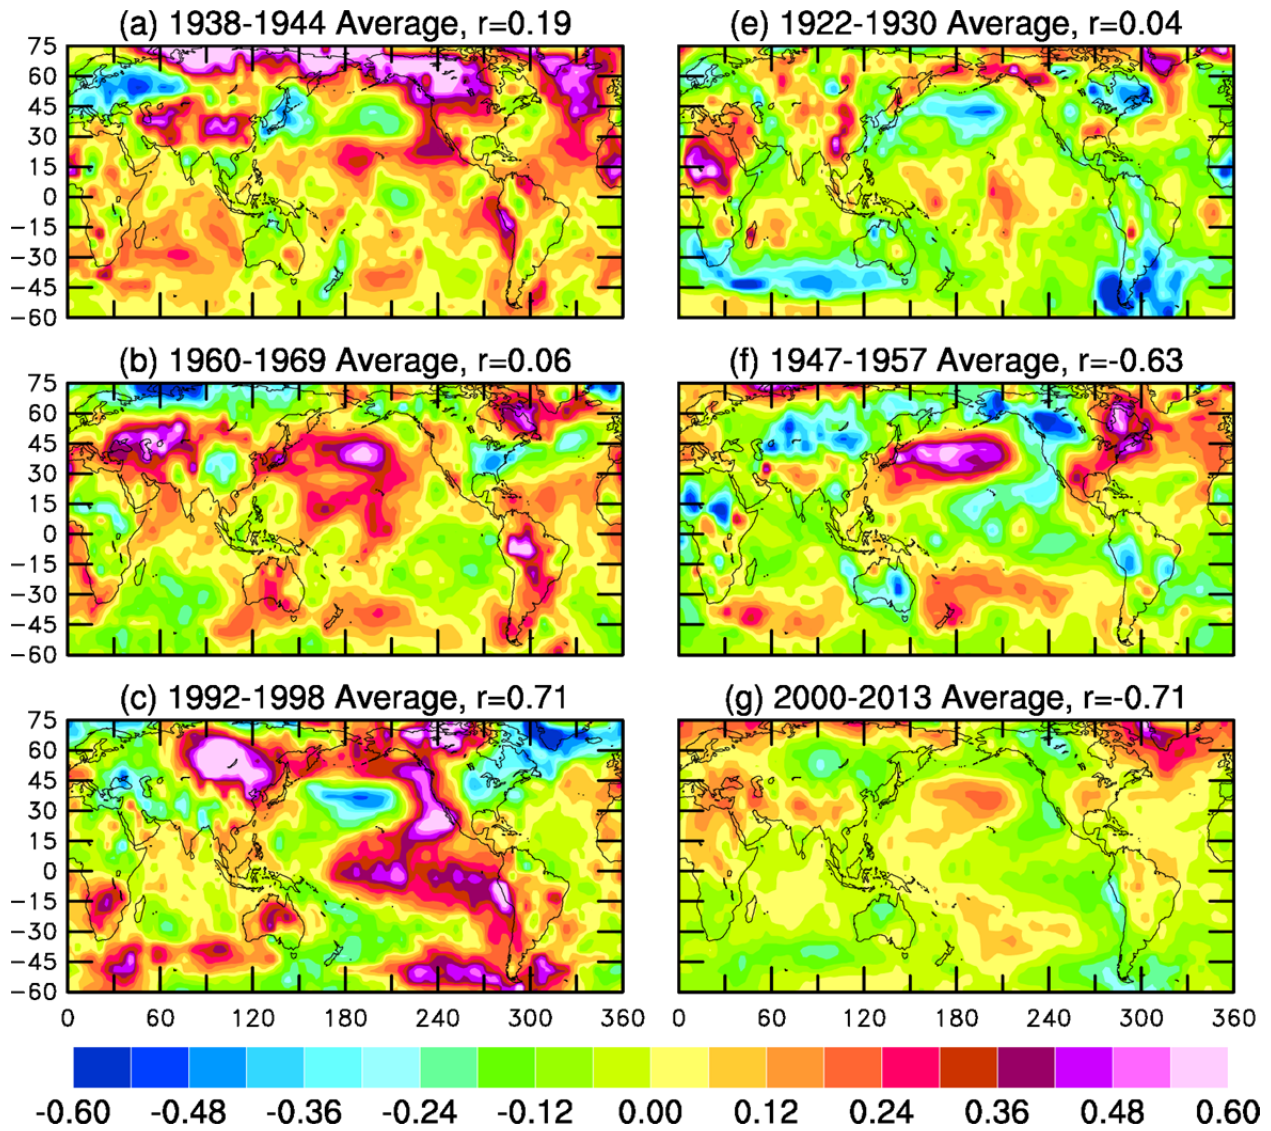

330

331 **FIG. S8.** Same as Fig. S4 but for using the HadCRUT4 data set.

332

333

334



335

336

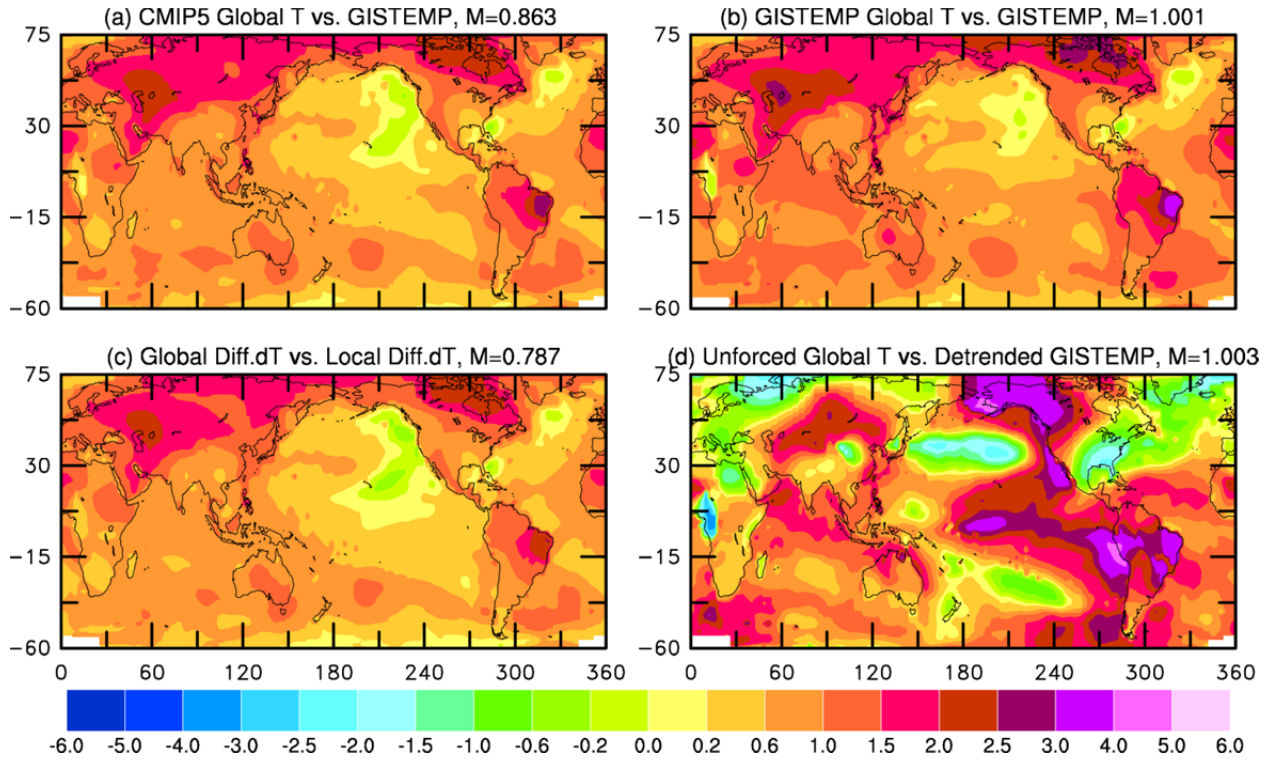

337

338 **FIG. S9. Patterns of the regression coefficients.** (a) between globally-averaged CMIP5 multi-  
 339 model ensemble mean temperature anomalies ( $T'$ ) (as the  $x$  variable) and local  $T'$  series from  
 340 GISTEMP data set ( $b_F(i)$  in Eq. 6 in SI). (b) between the global-mean and local  $T'$  series from  
 341 GISTEMP. (c) between the global-mean and local  $T'$  series of the difference field between the  $T'$   
 342 represented by panel (b) and (a) ( $b_D(i)$  in Eq. 10 in SI). (d) between unforced global-mean  $T'$   
 343 and local detrended  $T'$  from GISTEMP ( $b_N(i)$  in Eq. 6 in SI). The pattern correlation coefficient  
 344 is 0.98 between (a) and (b), 0.99 between (a) and (c), and 0.11 between (a) and (d). The area-  
 345 weighted global mean (M) is shown on top of each panel.

346

347

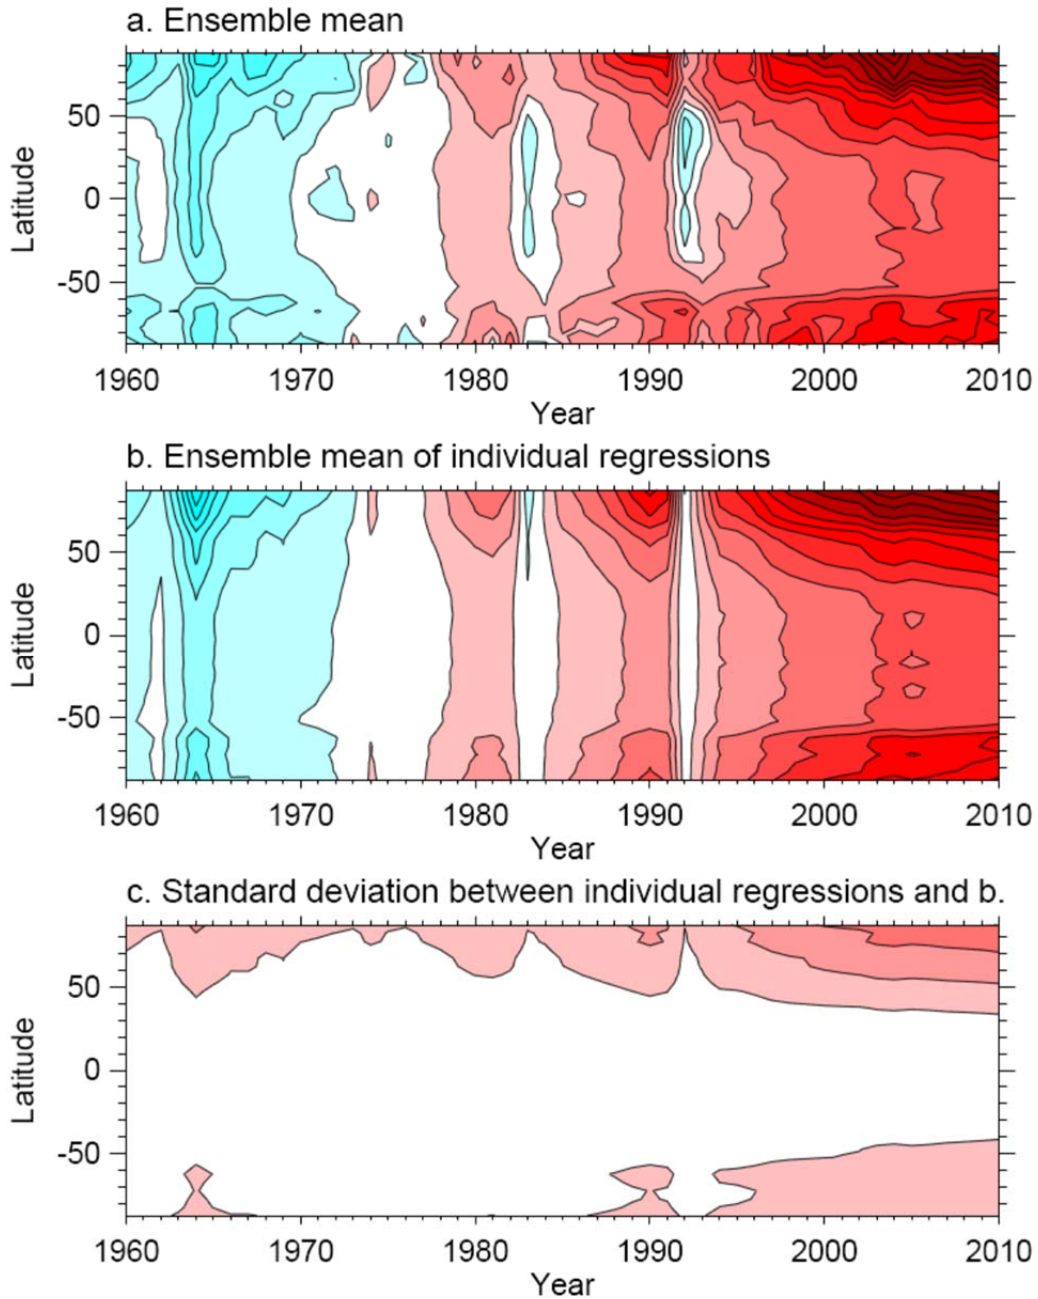

348

349 **FIG. S10.** Zonally-averaged surface air temperature anomalies ( $T'$ , relative to the 1961-1990  
 350 mean) from 1960-2010 from an ensemble of 40 historical simulations by a coupled model<sup>2</sup>. (a) 40  
 351 member ensemble mean of the model-simulated  $T'$ . (b) 40-member ensemble mean of the  
 352 estimated  $T'$  using the global-mean  $T'$  series from the 40-member ensemble mean and its  
 353 regression equation with local  $T'$  series for each member (cf. Eq. 4 in SI). (c) Standard deviation  
 354 the regression-estimated  $T'$  among the individual runs. The contour interval is  $0.15^{\circ}\text{C}$  and the  
 355 contours are at ...,  $-0.375$ ,  $-0.225$ ,  $-0.075$ ,  $0.075$ ,  $0.225$ ,  $0.375^{\circ}\text{C}$ , ... .

Decadal modulation of global surface temperature by internal climate variability

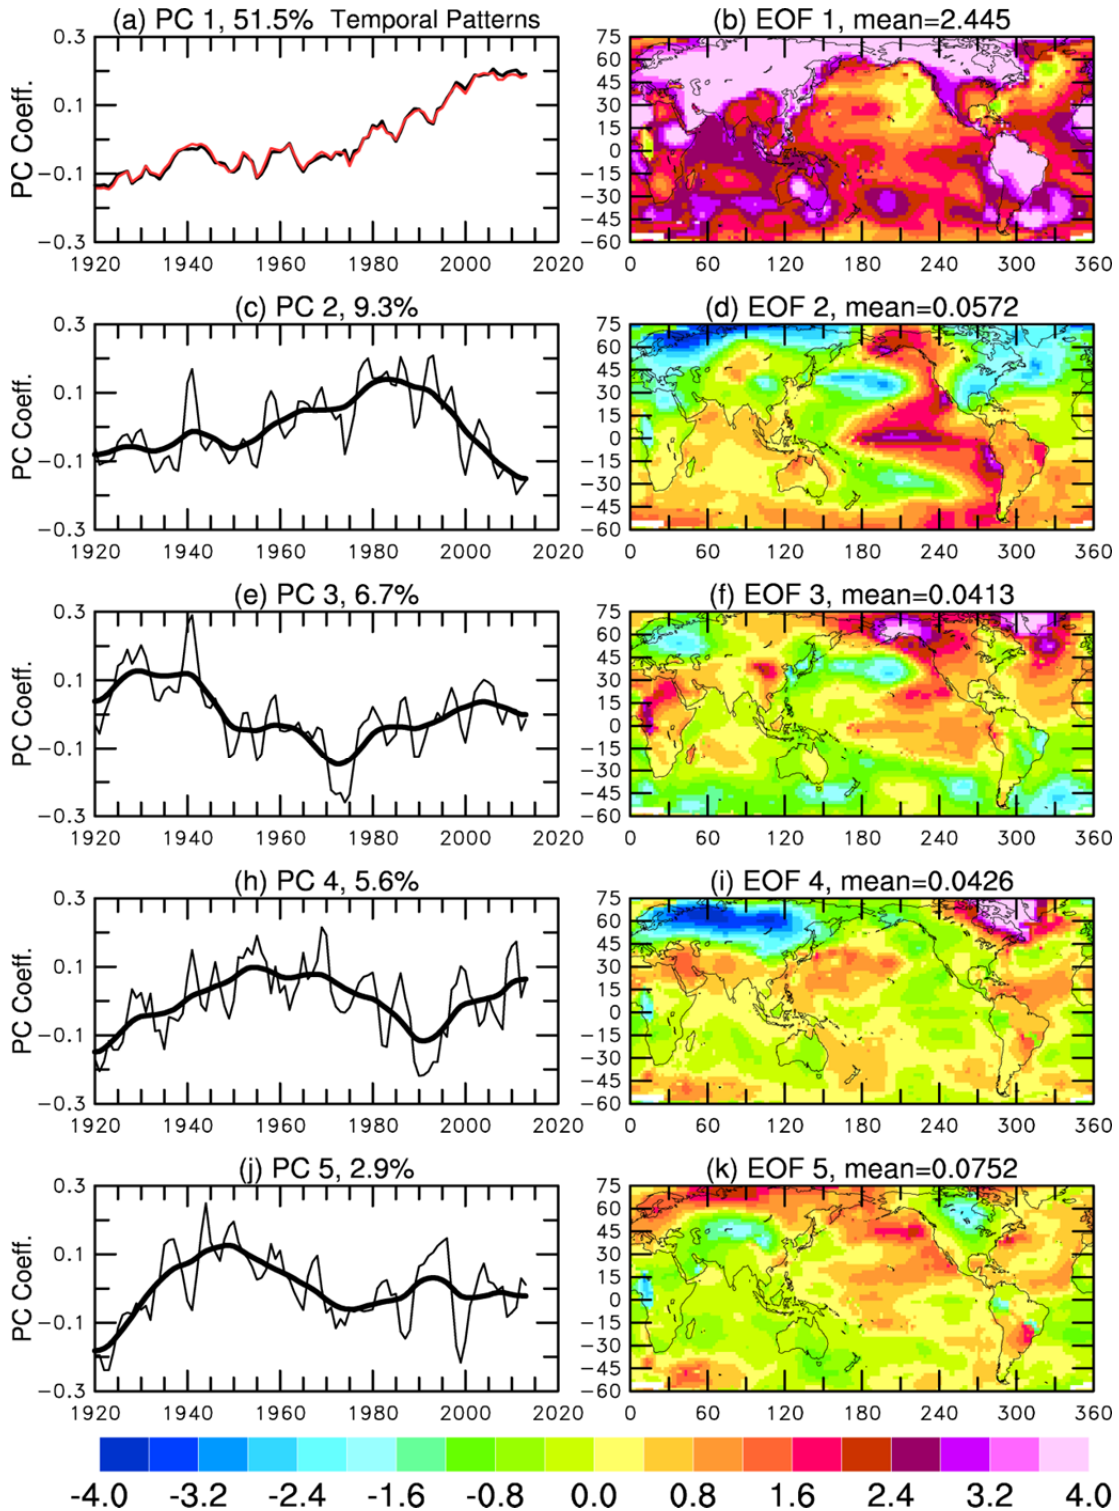

356

357 **FIG. S11.** The PCs (thick line is a smoothed curve as in Fig. 2a) and EOFs for the leading five  
 358 EOF modes of the un-detrended GISTEMP data. Red line in (a) is the near-global (60°S-75°N)  
 359 mean surface temperature anomalies in unit of 10 standard deviation ( $=2.53^{\circ}\text{C}$ ), i.e., for a reading  
 360 of 0.1 on (a), the anomaly is  $0.253^{\circ}\text{C}$ .
